# Supplementary material for: Pollution Gradients Altered the Bacterial Community Composition and Stochastic Process of Rural Polluted Ponds
Source: PubMed Central journal article supplement (PMC7074964; doi:10.3390/microorganisms8020311), 2020-02-24
Supplement: microorganisms-08-00311-s001.pdf [file microorganisms-08-00311-s001.pdf]

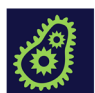

## Supplementary Materials

**Table S1.** Spearman's ranked correlation between the alpha diversity and water quality indexes.

|                    | Shannon | Observed richness | Chao 1    |
|--------------------|---------|-------------------|-----------|
| pH                 | 0.016*  | <0.001***         | <0.001*** |
| NH <sub>3</sub> -N | 0.314   | 0.040*            | 0.021*    |
| TP                 | 0.334   | 0.022*            | 0.014*    |
| COD                | 0.217   | 0.866             | 0.831     |
| TN                 | 0.479   | 0.812             | 0.589     |

Significant correlation coefficient at: \* $P \leq 0.05$ ; \*\* $P \leq 0.01$ ; \*\*\* $P \leq 0.001$ .

**Table S2.** Spearman's ranked correlation between the alpha diversity and environmental variables in sediment samples.

|                    | Shannon  | Inv_Simpson | Observed richness | Chao 1  |
|--------------------|----------|-------------|-------------------|---------|
| pH                 | 0.348    | 0.467       | 0.243             | 0.378   |
| B                  | 0.694    | 0.908       | 0.534             | 0.306   |
| Cr                 | 0.821    | 0.691       | 0.71              | 0.869   |
| Ni                 | 0.659    | 0.575       | 0.595             | 0.691   |
| Cu                 | 0.003*** | 0.025*      | 0.001***          | 0.001** |
| Zn                 | 0.003**  | 0.018*      | 0.003**           | 0.003** |
| As                 | 0.17     | 0.15        | 0.171             | 0.285   |
| Cd                 | 0.716    | 0.339       | 0.891             | 0.981   |
| Pb                 | 0.576    | 0.64        | 0.609             | 0.343   |
| Hg                 | 0.558    | 0.494       | 0.434             | 0.831   |
| TP                 | 0.977    | 0.801       | 0.856             | 0.915   |
| TN                 | 0.609    | 0.354       | 0.78              | 0.703   |
| NH <sub>3</sub> -N | 0.777    | 0.461       | 0.86              | 0.84    |
| OM                 | 0.65     | 0.956       | 0.539             | 0.606   |

Significant correlation coefficient at: \* $P \leq 0.05$ ; \*\* $P \leq 0.01$ ; \*\*\* $P \leq 0.001$ .

**Table S3.** Mantel test of dominant bacteria at phylum level among different pollutant levels in water samples.

| Environmental factor | Proteobacteria | Bacteroidetes | Firmicutes | Cyanobacteria/Chloroplast | Actinobacteria |
|----------------------|----------------|---------------|------------|---------------------------|----------------|
|                      | <i>p</i>       | <i>p</i>      | <i>p</i>   | <i>p</i>                  | <i>p</i>       |
| pH                   | 0.228          | 0.001***      | 0.001***   | 0.001***                  | 0.003**        |
| NH <sub>3</sub> -N   | 0.007**        | 0.266         | 0.040*     | 0.047*                    | 0.009**        |
| TP                   | 0.009**        | 0.068         | 0.031*     | 0.039*                    | 0.245          |
| COD                  | 0.290          | 0.495         | 0.097      | 0.112                     | 0.224          |
| TN                   | 0.004**        | 0.256         | 0.128      | 0.123                     | 0.005**        |

Table S4. Mantel test of dominant phylum and environmental factors in sediment.

| Environmenta<br>l factor | Proteobacteri<br>a | Bacteroidete<br>s | Firmicute<br>s | Chloroflex<br>i | Actinobacteri<br>a | Acidobacteri<br>a |
|--------------------------|--------------------|-------------------|----------------|-----------------|--------------------|-------------------|
|                          | <i>p</i>           | <i>p</i>          | <i>p</i>       | <i>p</i>        | <i>p</i>           | <i>p</i>          |
| pH                       | 0.440              | 0.109             | 0.234          | 0.923           | 0.178              | 0.019*            |
| B                        | 0.698              | 0.133             | 0.315          | 0.859           | 0.752              | 0.322             |
| Cr                       | 0.103              | 0.290             | 0.236          | 0.264           | 0.041*             | 0.297             |
| Ni                       | 0.204              | 0.294             | 0.272          | 0.267           | 0.064              | 0.274             |
| Cu                       | 0.024*             | 0.165             | 0.036*         | 0.210           | 0.014*             | 0.169             |
| Zn                       | 0.004**            | 0.098             | 0.010**        | 0.531           | 0.020*             | 0.100             |
| As                       | 0.131              | 0.169             | 0.118          | 0.029*          | 0.031*             | 0.033*            |
| Cd                       | 0.963              | 0.130             | 0.241          | 0.183           | 0.842              | 0.262             |
| Pb                       | 0.243              | 0.715             | 0.504          | 0.594           | 0.294              | 0.544             |
| Hg                       | 0.850              | 0.140             | 0.074          | 0.437           | 0.630              | 0.307             |
| TP                       | 0.131              | 0.768             | 0.616          | 0.150           | 0.052              | 0.610             |
| TN                       | 0.103              | 0.358             | 0.420          | 0.185           | 0.018*             | 0.317             |
| NH <sub>3</sub> -N       | 0.036*             | 0.326             | 0.236          | 0.038*          | 0.011*             | 0.272             |
| OM                       | 0.105              | 0.302             | 0.209          | 0.200           | 0.007**            | 0.538             |

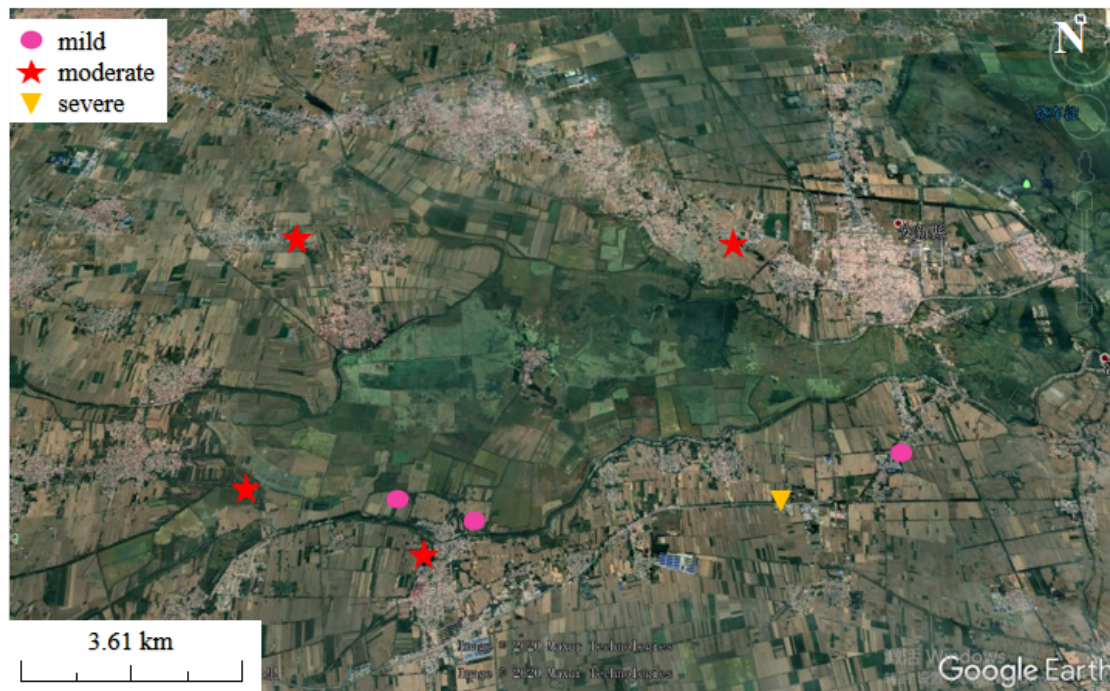

Figure S1. The geological locations of sampling sites.
